# Supplementary material for: Prognostic significance and mechanisms of CXCL genes in clear cell renal cell carcinoma
Source: publisher site journal article supplement (doi:10.18632/aging.204922), 2023-08-03
Supplement: Supplementary file [file aging-v15i16-204922-supplementary-material-SD1.pdf]

## SUPPLEMENTARY MATERIALS

One year ago, we authored the initial draft of our research paper and submitted it to the pre-print section of Nature Research Square (<https://www.researchsquare.com/article/rs-1550360/v1>). Over the past year, we conducted a comprehensive series of bioinformatics studies and

*in vitro* experiments, incorporating the novel findings into the revised version of our paper. Upon comparison of the current version with the initial draft, we discovered that Figure 7 was present in both iterations, whereas several other figures have been omitted.
