# Supplementary material for: Prognostic significance and mechanisms of CXCL genes in clear cell renal cell carcinoma
Source: publisher site journal article supplement (doi:10.18632/aging.204922), 2023-08-03
Supplement: Supplementary file [file aging-v15i16-204922-supplementary-material-SD2.pdf]

# SUPPLEMENTARY FIGURES

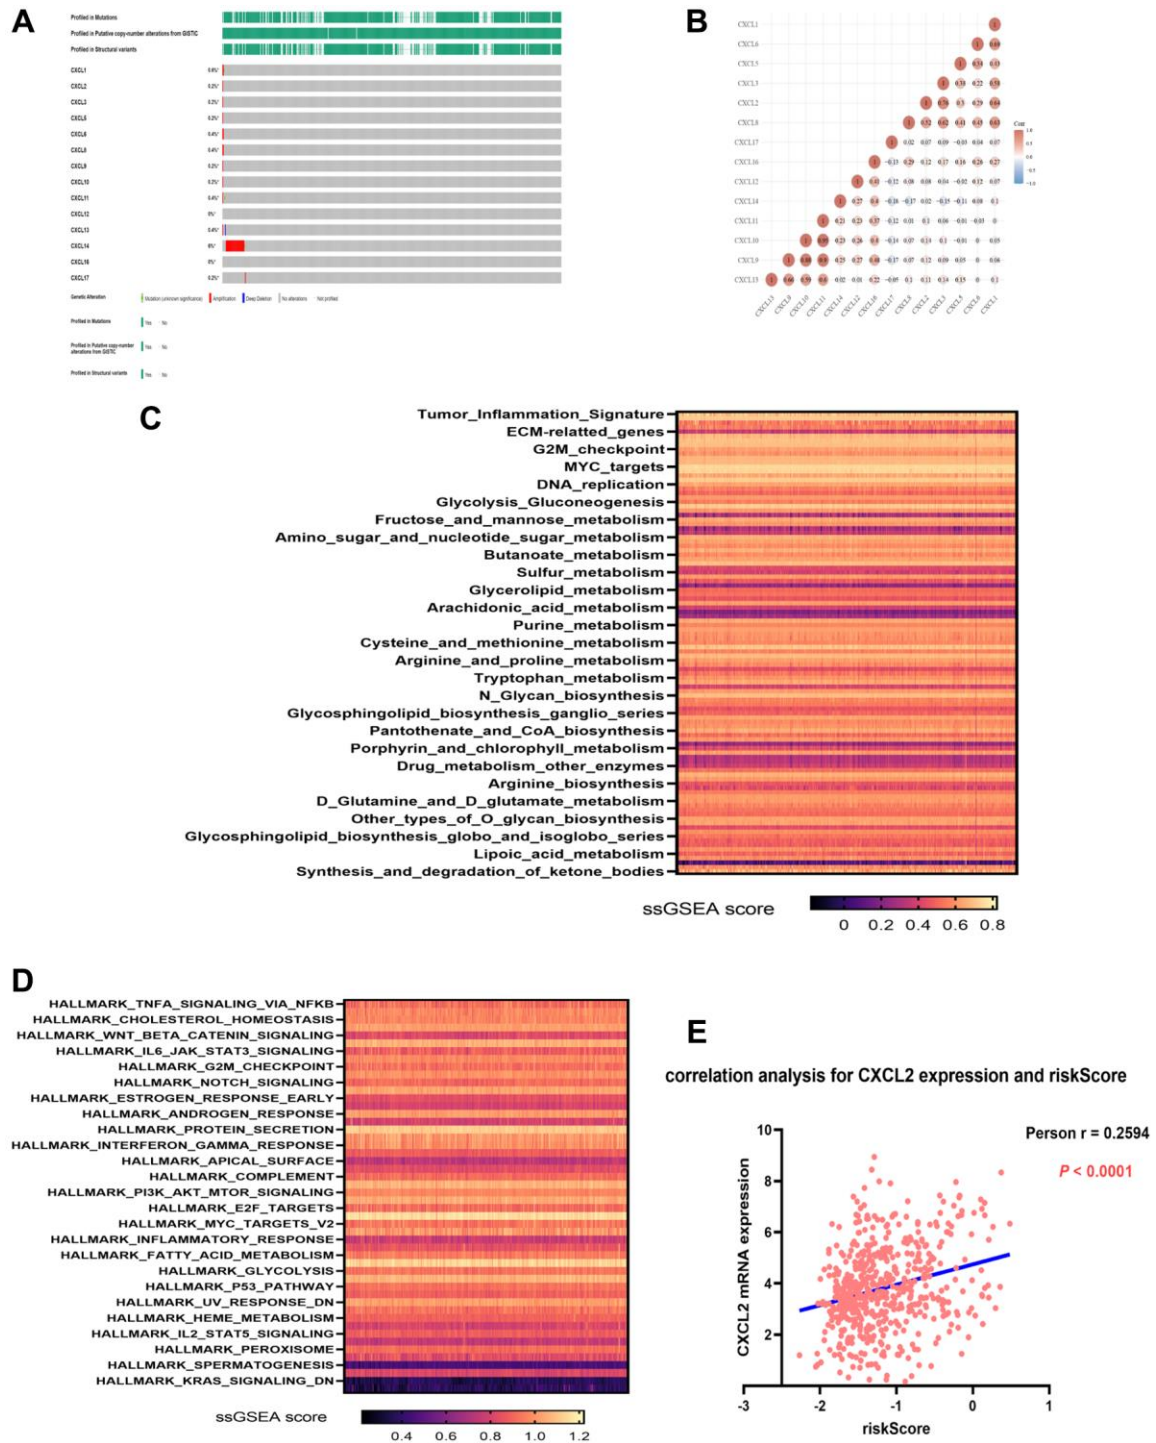

**Supplementary Figure 1.** (A) The mutation condition of CXCL genes in the KIRC dataset; (B) The correlation between CXCL genes in KIRC the dataset; (C, D) The correlation between CXCL2 gene expression and pathway ssGSVA score, c KIRC, d CM; (E) The correlation between CXCL2 gene expression and TAN related risk score.

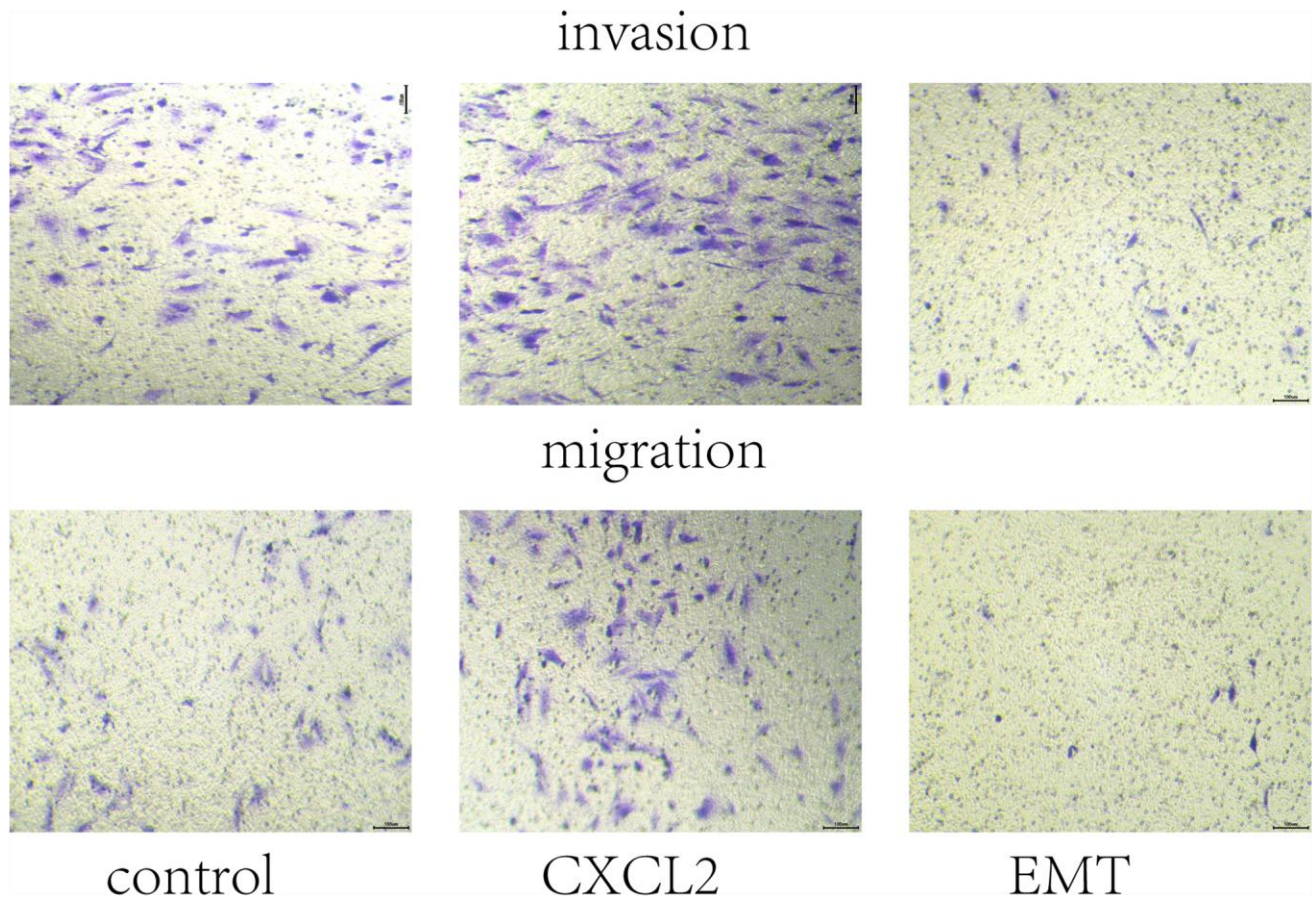

**Supplementary Figure 2. The cell invasion and migration abilities under three conditions: control group, the CXCL2 (100 ng/ml) group, and CXCL2 (100 ng/ml) combined with EMT inhibitor 1 group.**
