# Supplementary material for: Prognostic significance and mechanisms of CXCL genes in clear cell renal cell carcinoma
Source: publisher site journal article supplement (doi:10.18632/aging.204922), 2023-08-03
Supplement: Supplementary file [file aging-v15i16-204922-supplementary-material-SD3.pdf]

## SUPPLEMENTARY TABLE

Supplementary Table 1. The markers from two TAN subtypes (N2 subtype was pro-tumoral and N1 subtype was anti-tumoral) from the literature.

| TAN 1 marker | TAN 2 marker |
|--------------|--------------|
| ARG1         | ARG1         |
| CCL3         | IL-6         |
| CXCL10       | IL-17        |
| CXCL9        | IL-8         |
| H2O2         | CXCL5        |
| IFNB1        | G-CSF        |
| IL-1B        | TGFB1        |
| IL-8         | GM-CSF       |
| NETS         | TNF          |
| ROS          | MPO          |
| TNF          | CXCL2        |
|              | CCL2         |
|              | CCL5         |
|              | CCL3         |
|              | CCL17        |
|              | ROS          |
|              | NE           |
|              | VEGF         |
|              | H2O2         |
|              | MMP9         |
|              | HGF          |
|              | OSM          |
|              | NETS         |
