# Supplementary material for: Prognostic significance and mechanisms of CXCL genes in clear cell renal cell carcinoma
Source: Aging (Albany NY). 2023 Aug 3;15(16):7974–96. doi: 10.18632/aging.204922 (PMC10497021; doi:10.18632/aging.204922)
Supplement: Supplementary Table 3 [file aging-15-204922-s005.xlsx]

## Sheet: unsupervised cluster for TAN
Supplementary Table 3. Five subtypes information for TCGA-KIRC patients.
	Cluster
TCGA-CJ-4639-01	C1
TCGA-BP-4964-01	C1
TCGA-A3-A8OW-01	C1
TCGA-BP-4983-01	C2
TCGA-B0-5698-01	C1
TCGA-BP-5186-01	C1
TCGA-BP-5001-01	C3
TCGA-CZ-5461-01	C2
TCGA-CZ-5456-01	C2
TCGA-B0-4706-01	C1
TCGA-A3-3328-01	C4
TCGA-A3-3383-01	C1
TCGA-B2-3924-01	C1
TCGA-B0-4844-01	C2
TCGA-B0-4718-01	C2
TCGA-CZ-5467-01	C1
TCGA-AK-3429-01	C1
TCGA-CJ-5672-01	C1
TCGA-B0-4819-01	C2
TCGA-BP-5187-01	C2
TCGA-AK-3460-01	C1
TCGA-DV-A4W0-01	C2
TCGA-B8-5550-01	C1
TCGA-CJ-4876-01	C1
TCGA-A3-3352-01	C1
TCGA-BP-5182-01	C1
TCGA-CJ-5678-01	C1
TCGA-B2-5639-01	C1
TCGA-CJ-4884-01	C1
TCGA-B0-4688-01	C2
TCGA-AK-3426-01	C1
TCGA-BP-4784-01	C1
TCGA-CW-6097-01	C2
TCGA-B0-4690-01	C2
TCGA-BP-4325-01	C1
TCGA-CJ-4893-01	C1
TCGA-BP-4799-01	C3
TCGA-B0-5711-01	C1
TCGA-BP-4797-01	C1
TCGA-T7-A92I-01	C3
TCGA-CJ-4641-01	C2
TCGA-CJ-5686-01	C2
TCGA-B0-4834-01	C4
TCGA-A3-3325-01	C3
TCGA-B0-5702-01	C3
TCGA-AK-3431-01	C2
TCGA-BP-4758-01	C1
TCGA-B0-4848-01	C2
TCGA-CJ-4888-01	C1
TCGA-A3-3382-01	C3
TCGA-B0-5081-01	C1
TCGA-BP-4159-01	C3
TCGA-CW-5588-01	C2
TCGA-CW-5591-01	C3
TCGA-B0-5693-01	C3
TCGA-BP-4804-01	C2
TCGA-B0-5710-01	C2
TCGA-CZ-4865-01	C1
TCGA-BP-4334-01	C4
TCGA-CZ-5453-01	C3
TCGA-AK-3461-01	C2
TCGA-DV-5573-01	C1
TCGA-B0-4813-01	C2
TCGA-BP-4329-01	C2
TCGA-BP-4756-01	C3
TCGA-BP-5169-01	C3
TCGA-B0-5696-01	C1
TCGA-EU-5904-01	C2
TCGA-CZ-4862-01	C1
TCGA-CZ-5458-01	C1
TCGA-3Z-A93Z-01	C1
TCGA-CZ-5462-01	C2
TCGA-B0-5694-01	C3
TCGA-BP-4782-01	C1
TCGA-CJ-4643-01	C2
TCGA-B2-4101-01	C1
TCGA-B2-5636-01	C3
TCGA-CZ-4857-01	C2
TCGA-EU-5906-01	C2
TCGA-AK-3433-01	C4
TCGA-B2-5635-01	C1
TCGA-CJ-4891-01	C2
TCGA-B2-3923-01	C4
TCGA-A3-3317-01	C1
TCGA-B0-4816-01	C2
TCGA-B0-4828-01	C1
TCGA-CJ-4869-01	C1
TCGA-MM-A563-01	C1
TCGA-CJ-5675-01	C1
TCGA-EU-5907-01	C2
TCGA-B2-5633-01	C3
TCGA-CZ-4854-01	C2
TCGA-BP-4759-01	C3
TCGA-CJ-4874-01	C1
TCGA-CZ-4861-01	C2
TCGA-B0-5102-01	C1
TCGA-DV-5569-01	C2
TCGA-B8-4622-01	C3
TCGA-CZ-5460-01	C2
TCGA-CJ-4871-01	C2
TCGA-A3-3378-01	C2
TCGA-BP-5189-01	C3
TCGA-A3-A6NJ-01	C1
TCGA-A3-3385-01	C4
TCGA-B0-5700-01	C2
TCGA-CJ-6032-01	C2
TCGA-B0-4846-01	C1
TCGA-CJ-4644-01	C1
TCGA-B8-5163-01	C5
TCGA-A3-3329-01	C1
TCGA-CZ-4860-01	C2
TCGA-CJ-6030-01	C2
TCGA-AK-3440-01	C4
TCGA-BP-4977-01	C5
TCGA-BP-4353-01	C2
TCGA-A3-3363-01	C3
TCGA-CZ-4864-01	C1
TCGA-CJ-5689-01	C2
TCGA-CJ-5680-01	C3
TCGA-B0-4852-01	C5
TCGA-B8-A54D-01	C1
TCGA-BP-4326-01	C2
TCGA-B0-5705-01	C1
TCGA-A3-3349-01	C3
TCGA-A3-3343-01	C1
TCGA-BP-5008-01	C2
TCGA-A3-3313-01	C3
TCGA-B0-5097-01	C2
TCGA-CZ-5463-01	C1
TCGA-BP-4173-01	C1
TCGA-B2-4098-01	C3
TCGA-MW-A4EC-01	C1
TCGA-B8-4146-01	C3
TCGA-6D-AA2E-01	C2
TCGA-B0-4824-01	C1
TCGA-B0-4837-01	C2
TCGA-BP-5192-01	C3
TCGA-AK-3454-01	C3
TCGA-CJ-4907-01	C1
TCGA-B0-4815-01	C2
TCGA-CJ-6027-01	C1
TCGA-A3-3311-01	C2
TCGA-BP-4351-01	C3
TCGA-CW-6090-01	C2
TCGA-BP-4166-01	C1
TCGA-B0-4841-01	C3
TCGA-BP-4165-01	C1
TCGA-CW-5583-01	C3
TCGA-BP-4993-01	C1
TCGA-CJ-4887-01	C1
TCGA-BP-4965-01	C1
TCGA-AK-3456-01	C3
TCGA-CZ-4863-01	C1
TCGA-BP-4974-01	C2
TCGA-B0-4707-01	C3
TCGA-A3-3331-01	C2
TCGA-BP-4766-01	C5
TCGA-AK-3458-01	C3
TCGA-CJ-4912-01	C3
TCGA-A3-A6NI-01	C1
TCGA-BP-4774-01	C2
TCGA-BP-4330-01	C1
TCGA-CZ-5468-01	C2
TCGA-BP-4762-01	C1
TCGA-B0-4838-01	C1
TCGA-CJ-4894-01	C1
TCGA-B0-5709-01	C5
TCGA-CJ-4895-01	C2
TCGA-CJ-4885-01	C3
TCGA-B4-5838-01	C1
TCGA-B0-4836-01	C2
TCGA-B0-5119-01	C1
TCGA-BP-4343-01	C1
TCGA-A3-3316-01	C2
TCGA-B0-5088-01	C1
TCGA-A3-3324-01	C1
TCGA-CJ-6031-01	C1
TCGA-B0-4701-01	C1
TCGA-AK-3443-01	C4
TCGA-B0-5108-01	C2
TCGA-B0-5109-01	C2
TCGA-BP-4991-01	C1
TCGA-A3-3359-01	C1
TCGA-A3-3357-01	C1
TCGA-CZ-4859-01	C3
TCGA-BP-4961-01	C3
TCGA-A3-A8OU-01	C2
TCGA-BP-4174-01	C5
TCGA-CJ-4903-01	C1
TCGA-B8-5159-01	C1
TCGA-BP-4763-01	C3
TCGA-BP-4795-01	C1
TCGA-BP-4346-01	C1
TCGA-BP-5190-01	C3
TCGA-B0-4810-01	C2
TCGA-BP-4803-01	C3
TCGA-BP-4164-01	C1
TCGA-BP-4338-01	C3
TCGA-A3-A6NL-01	C1
TCGA-CZ-5451-01	C1
TCGA-B8-4619-01	C4
TCGA-BP-4982-01	C2
TCGA-BP-4998-01	C2
TCGA-A3-3326-01	C1
TCGA-CJ-4870-01	C3
TCGA-BP-5185-01	C4
TCGA-B8-5546-01	C4
TCGA-BP-4781-01	C2
TCGA-BP-4335-01	C2
TCGA-BP-4968-01	C1
TCGA-CJ-4636-01	C1
TCGA-BP-4176-01	C2
TCGA-BP-4170-01	C1
TCGA-A3-3362-01	C1
TCGA-BP-5000-01	C1
TCGA-CJ-4908-01	C1
TCGA-B0-5713-01	C1
TCGA-B0-4845-01	C3
TCGA-CJ-4873-01	C1
TCGA-B0-4713-01	C3
TCGA-B0-4714-01	C1
TCGA-BP-5184-01	C1
TCGA-BP-4787-01	C2
TCGA-CZ-5985-01	C5
TCGA-B0-5399-01	C1
TCGA-AK-3465-01	C4
TCGA-CZ-5469-01	C3
TCGA-BP-4798-01	C1
TCGA-BP-4971-01	C1
TCGA-CZ-5459-01	C2
TCGA-B0-4710-01	C5
TCGA-B8-4148-01	C1
TCGA-BP-4337-01	C1
TCGA-BP-5175-01	C3
TCGA-BP-4973-01	C1
TCGA-B0-4839-01	C3
TCGA-BP-4969-01	C3
TCGA-B0-4811-01	C3
TCGA-CW-5580-01	C1
TCGA-B0-4827-01	C1
TCGA-CJ-5681-01	C3
TCGA-CW-5590-01	C1
TCGA-CJ-4916-01	C1
TCGA-BP-5004-01	C1
TCGA-BP-4345-01	C2
TCGA-B8-5551-01	C2
TCGA-BP-4987-01	C1
TCGA-CJ-4872-01	C2
TCGA-BP-4777-01	C1
TCGA-CW-5581-01	C1
TCGA-B0-5095-01	C2
TCGA-BP-4177-01	C3
TCGA-DV-5574-01	C2
TCGA-B4-5378-01	C3
TCGA-B0-5706-01	C1
TCGA-B8-A7U6-01	C2
TCGA-A3-3358-01	C1
TCGA-A3-3308-01	C2
TCGA-B0-5402-01	C1
TCGA-CZ-5454-01	C2
TCGA-BP-4995-01	C1
TCGA-B8-A54F-01	C3
TCGA-B0-4847-01	C1
TCGA-BP-4162-01	C1
TCGA-B0-4712-01	C2
TCGA-DV-A4VX-01	C1
TCGA-BP-5177-01	C1
TCGA-CW-6093-01	C5
TCGA-B0-4818-01	C1
TCGA-CJ-4634-01	C3
TCGA-AK-3450-01	C3
TCGA-BP-5009-01	C3
TCGA-B8-A54E-01	C3
TCGA-BP-5174-01	C3
TCGA-BP-5191-01	C3
TCGA-B0-4814-01	C2
TCGA-B0-5116-01	C3
TCGA-B0-5084-01	C3
TCGA-B8-A54H-01	C1
TCGA-B8-4621-01	C3
TCGA-BP-4790-01	C1
TCGA-A3-3335-01	C3
TCGA-CW-5587-01	C1
TCGA-BP-4999-01	C3
TCGA-CJ-5671-01	C2
TCGA-B0-4696-01	C2
TCGA-B8-5158-01	C2
TCGA-DV-5568-01	C2
TCGA-CZ-4856-01	C1
TCGA-CJ-4878-01	C2
TCGA-BP-4761-01	C3
TCGA-G6-A8L6-01	C1
TCGA-AK-3425-01	C2
TCGA-B8-5165-01	C1
TCGA-B8-A8YJ-01	C2
TCGA-CJ-4918-01	C2
TCGA-B0-5115-01	C2
TCGA-G6-A8L8-01	C1
TCGA-BP-4985-01	C2
TCGA-CW-6087-01	C1
TCGA-BP-5168-01	C1
TCGA-A3-3323-01	C3
TCGA-AK-3445-01	C1
TCGA-MM-A84U-01	C3
TCGA-B2-4099-01	C1
TCGA-BP-5201-01	C1
TCGA-B0-4843-01	C2
TCGA-B0-5085-01	C2
TCGA-BP-4801-01	C2
TCGA-BP-5198-01	C2
TCGA-BP-4354-01	C2
TCGA-BP-4760-01	C2
TCGA-DV-5576-01	C3
TCGA-BP-4789-01	C3
TCGA-AK-3428-01	C2
TCGA-CJ-4900-01	C1
TCGA-A3-3380-01	C1
TCGA-B0-5697-01	C2
TCGA-B0-5100-01	C3
TCGA-B8-4154-01	C1
TCGA-A3-3320-01	C2
TCGA-BP-4163-01	C1
TCGA-BP-5196-01	C2
TCGA-A3-A8CQ-01	C1
TCGA-CJ-5676-01	C3
TCGA-BP-4347-01	C1
TCGA-CJ-4905-01	C1
TCGA-BP-4962-01	C1
TCGA-B0-5712-01	C3
TCGA-A3-3351-01	C2
TCGA-BP-4355-01	C3
TCGA-AK-3455-01	C1
TCGA-BP-4332-01	C2
TCGA-B0-4703-01	C2
TCGA-CZ-5984-01	C3
TCGA-B0-5077-01	C2
TCGA-B2-4102-01	C1
TCGA-B0-5110-01	C2
TCGA-B0-5692-01	C1
TCGA-BP-5007-01	C1
TCGA-B8-4620-01	C2
TCGA-B0-5695-01	C2
TCGA-G6-A5PC-01	C3
TCGA-DV-5575-01	C2
TCGA-CJ-4868-01	C2
TCGA-BP-5181-01	C1
TCGA-B0-5120-01	C2
TCGA-CZ-5988-01	C1
TCGA-BP-4963-01	C1
TCGA-CJ-4882-01	C2
TCGA-CW-5589-01	C1
TCGA-CZ-5455-01	C1
TCGA-BP-4970-01	C2
TCGA-B0-4698-01	C2
TCGA-DV-5565-01	C2
TCGA-B0-5099-01	C3
TCGA-B8-4153-01	C3
TCGA-A3-3370-01	C1
TCGA-DV-5566-01	C2
TCGA-AK-3434-01	C1
TCGA-B0-5812-01	C1
TCGA-A3-3322-01	C3
TCGA-B0-4693-01	C1
TCGA-CZ-5989-01	C3
TCGA-A3-3319-01	C5
TCGA-G6-A8L7-01	C3
TCGA-BP-5180-01	C2
TCGA-B0-4842-01	C1
TCGA-CZ-5452-01	C1
TCGA-B0-5707-01	C3
TCGA-BP-5183-01	C1
TCGA-B0-5691-01	C2
TCGA-BP-4344-01	C2
TCGA-B0-5098-01	C3
TCGA-A3-3307-01	C1
TCGA-BP-4981-01	C3
TCGA-B4-5836-01	C2
TCGA-CZ-4853-01	C1
TCGA-B0-4823-01	C1
TCGA-CJ-4635-01	C2
TCGA-A3-A8OX-01	C5
TCGA-B0-4821-01	C2
TCGA-BP-5006-01	C2
TCGA-BP-4976-01	C3
TCGA-BP-4959-01	C3
TCGA-CJ-4901-01	C1
TCGA-BP-4327-01	C3
TCGA-CJ-4923-01	C2
TCGA-CJ-4902-01	C1
TCGA-CJ-4886-01	C1
TCGA-B8-5549-01	C1
TCGA-BP-5173-01	C1
TCGA-CJ-4881-01	C2
TCGA-BP-5178-01	C3
TCGA-BP-4992-01	C3
TCGA-CW-6088-01	C3
TCGA-B4-5377-01	C1
TCGA-BP-5170-01	C3
TCGA-A3-3306-01	C1
TCGA-B8-A54G-01	C1
TCGA-BP-4967-01	C3
TCGA-B4-5843-01	C3
TCGA-BP-5200-01	C1
TCGA-BP-4349-01	C1
TCGA-BP-4989-01	C1
TCGA-AK-3436-01	C3
TCGA-CJ-4897-01	C1
TCGA-BP-4975-01	C5
TCGA-BP-5010-01	C2
TCGA-CJ-4875-01	C3
TCGA-BP-4769-01	C2
TCGA-CJ-5682-01	C1
TCGA-B0-4849-01	C2
TCGA-B0-5094-01	C3
TCGA-CJ-4920-01	C2
TCGA-BP-5176-01	C3
TCGA-A3-3387-01	C1
TCGA-CJ-5679-01	C2
TCGA-GK-A6C7-01	C2
TCGA-BP-5195-01	C3
TCGA-B0-5121-01	C3
TCGA-B0-4694-01	C2
TCGA-B0-5703-01	C1
TCGA-B8-4151-01	C1
TCGA-BP-4341-01	C3
TCGA-CJ-4899-01	C2
TCGA-BP-5202-01	C1
TCGA-B0-5117-01	C4
TCGA-CJ-6028-01	C1
TCGA-BP-4994-01	C1
TCGA-CZ-5465-01	C2
TCGA-CJ-5683-01	C3
TCGA-BP-5199-01	C1
TCGA-B0-5107-01	C1
TCGA-DV-5567-01	C3
TCGA-BP-4167-01	C1
TCGA-B8-A54K-01	C3
TCGA-CJ-5684-01	C1
TCGA-AK-3427-01	C4
TCGA-A3-A6NN-01	C3
TCGA-A3-3374-01	C3
TCGA-B0-5096-01	C2
TCGA-B0-5083-01	C3
TCGA-A3-3346-01	C2
TCGA-B0-5400-01	C2
TCGA-B0-4697-01	C1
TCGA-B8-5164-01	C1
TCGA-CW-5585-01	C3
TCGA-CJ-6033-01	C2
TCGA-B4-5832-01	C3
TCGA-B4-5835-01	C3
TCGA-B0-5080-01	C2
TCGA-AS-3777-01	C4
TCGA-B0-5699-01	C1
TCGA-EU-5905-01	C3
TCGA-CJ-4889-01	C1
TCGA-CJ-4892-01	C1
TCGA-B0-5092-01	C2
TCGA-DV-A4VZ-01	C3
TCGA-AS-3778-01	C1
TCGA-BP-4768-01	C3
TCGA-BP-5194-01	C1
TCGA-B8-5162-01	C5
TCGA-BP-4986-01	C2
TCGA-CZ-4866-01	C3
TCGA-BP-4775-01	C1
TCGA-B8-5553-01	C5
TCGA-A3-A8OV-01	C3
TCGA-CJ-4642-01	C3
TCGA-CJ-4890-01	C1
TCGA-BP-4161-01	C2
TCGA-B2-5641-01	C5
TCGA-A3-3347-01	C2
TCGA-CZ-5987-01	C2
TCGA-B0-5690-01	C2
TCGA-CZ-4858-01	C2
TCGA-CJ-5677-01	C1
TCGA-BP-4988-01	C5
TCGA-CZ-5464-01	C1
TCGA-BP-4972-01	C2
TCGA-AK-3451-01	C3
TCGA-CZ-5457-01	C3
TCGA-BP-4807-01	C2
TCGA-BP-4770-01	C2
TCGA-BP-4158-01	C3
TCGA-B8-A54I-01	C3
TCGA-BP-4771-01	C1
TCGA-CZ-5466-01	C1
TCGA-BP-4776-01	C2
TCGA-B0-4691-01	C1
TCGA-B4-5844-01	C1
TCGA-BP-4960-01	C2
TCGA-A3-3367-01	C1
TCGA-MM-A564-01	C3
TCGA-B4-5834-01	C1
TCGA-BP-4169-01	C2
TCGA-B8-5552-01	C2
TCGA-A3-3376-01	C3
TCGA-CW-5584-01	C3
TCGA-B0-4700-01	C2
TCGA-B8-5545-01	C2
TCGA-CJ-4640-01	C1
TCGA-CJ-4638-01	C3
TCGA-BP-4331-01	C3
TCGA-B0-5701-01	C3
TCGA-B0-4945-01	C1
TCGA-B0-5106-01	C1
TCGA-AK-3447-01	C4
TCGA-BP-4765-01	C2
TCGA-BP-4352-01	C3
TCGA-B0-4817-01	C5
TCGA-CJ-4637-01	C2
TCGA-B0-5104-01	C2
TCGA-CJ-4904-01	C1
TCGA-B0-4833-01	C1
TCGA-B8-4143-01	C2
TCGA-B2-A4SR-01	C1
TCGA-B0-5075-01	C1
TCGA-B0-4822-01	C3
TCGA-A3-3365-01	C2
TCGA-AK-3453-01	C1
TCGA-A3-3373-01	C3
TCGA-BP-4160-01	C1
TCGA-A3-3372-01	C1
TCGA-B8-A54J-01	C2
TCGA-CZ-5470-01	C1
TCGA-B0-4699-01	C2
TCGA-B0-5113-01	C1
TCGA-CZ-5982-01	C2
TCGA-CZ-5986-01	C1
TCGA-BP-4340-01	C1
TCGA-BP-4342-01	C2
