# Supplementary material for: Prognostic significance and mechanisms of CXCL genes in clear cell renal cell carcinoma
Source: Aging (Albany NY). 2023 Aug 3;15(16):7974–96. doi: 10.18632/aging.204922 (PMC10497021; doi:10.18632/aging.204922)
Supplement: Supplementary Table 4 [file aging-15-204922-s006.xlsx]

## Sheet: DEGs between C1-2 subtypes
Supplementary Table 4. Differentially expressed genes (DERs) between the C1/2 subtypes.
up.genes
MIOX	Up
TMEM125	Up
LGALS2	Up
C1orf210	Up
ACE2	Up
SLC5A12	Up
SLC13A1	Up
NAT8	Up
SMTNL2	Up
FUT6	Up
ACADL	Up
CLTRN	Up
LRRC19	Up
BBOX1	Up
CYP4A11	Up
OR2I1P	Up
SLC22A2	Up
TINAG	Up
HAO2	Up
SLC5A10	Up
PHYHIPL	Up
GLYATL1	Up
TMEM174	Up
SLC17A1	Up
SLC27A2	Up
GLYAT	Up
VIL1	Up
SLC6A13	Up
CYP4A22	Up
APOM	Up
SLC39A5	Up
HMGCS2	Up
HHLA2	Up
AGXT2	Up
ACSM2A	Up
SLC16A9	Up
NPR3	Up
ACSM2B	Up
TMEM82	Up
SLC23A3	Up
SLC47A1	Up
SLC17A3	Up
LRP2	Up
PKLR	Up
SMIM32	Up
SLC6A19	Up
DDC	Up
CYP2J2	Up
TMEM72	Up
GUCA2B	Up
SLC6A18	Up
SLC22A11	Up
CXCL14	Up
SLC5A1	Up
CUBN	Up
FTCD	Up
SLC22A6	Up
ALDOB	Up
UGT3A1	Up
AOC1	Up
SMIM24	Up
SLC16A12	Up
ALDH8A1	Up
SLC17A4	Up
SLC22A12	Up
SLC5A8	Up
SCGN	Up
PCK1	Up
SST	Up
CXCL8	Down
OSM	Down
IL6	Down
CXCL5	Down
SOCS3	Down
PLAUR	Down
CXCL2	Down
LIF	Down
SLC2A3	Down
IER3	Down
PODNL1	Down
SRPX2	Down
ARL4C	Down
STEAP3	Down
MMP19	Down
PTGS2	Down
TREM1	Down
IL1R2	Down
PDGFRL	Down
ADAM12	Down
GPRC5A	Down
FOSL1	Down
GFPT2	Down
SERPINE1	Down
CXCL1	Down
ROR2	Down
SCG2	Down
MT2A	Down
CPXM1	Down
IGDCC4	Down
PLTP	Down
TGFBI	Down
CLMP	Down
MMP9	Down
APCDD1L	Down
CTHRC1	Down
CFH	Down
COL6A3	Down
GXYLT2	Down
SEMA3C	Down
COL1A1	Down
COL11A1	Down
F3	Down
SFRP2	Down
COL5A1	Down
RFLNA	Down
AQP9	Down
EFNA5	Down
IGFBP1	Down
SLC7A5	Down
NCAM1	Down
G0S2	Down
MT1X	Down
CYP1B1	Down
FLNC	Down
CCDC80	Down
SLPI	Down
TFPI2	Down
LOX	Down
CXCL6	Down
EFEMP1	Down
LBP	Down
CHI3L1	Down
SPOCK1	Down
RARRES1	Down
SLC38A5	Down
LUM	Down
THBS2	Down
PI3	Down
PAEP	Down
C5orf46	Down
CCL20	Down
PPP1R1A	Down
MMP7	Down
DCN	Down
MFAP4	Down
NPTX2	Down
PTHLH	Down
SAA1	Down
PPDPFL	Down
KRT19	Down
