# Supplementary material for: Prognostic significance and mechanisms of CXCL genes in clear cell renal cell carcinoma
Source: Aging (Albany NY). 2023 Aug 3;15(16):7974–96. doi: 10.18632/aging.204922 (PMC10497021; doi:10.18632/aging.204922)
Supplement: Supplementary Table 5 [file aging-15-204922-s007.xlsx]

## Sheet: survival analysis for DREs
Supplementary Table 5. DERs with prognostic value.
Genes	p.value	HR	Low 95%CI	High 95%CI
MIOX	1.74e-05	0.50994	0.37503	0.693382
TMEM125	3.92e-10	0.35453	0.256204	0.490592
LGALS2	1.43e-06	0.466849	0.342521	0.636307
C1orf210	4.1e-12	0.307772	0.22058	0.429429
ACE2	8.55e-06	0.496353	0.364612	0.675695
SLC5A12	3.9e-05	0.527812	0.389269	0.715663
SLC13A1	3.14e-06	0.481419	0.35403	0.654645
NAT8	1.16e-06	0.463415	0.339878	0.631855
SMTNL2	4.61e-05	0.528183	0.388538	0.718017
FUT6	1.47e-08	0.398611	0.289966	0.547965
ACADL	0.000103207	0.547387	0.403826	0.741983
CLTRN	7.67e-09	0.39254	0.285804	0.539138
LRRC19	1.9e-08	0.401193	0.291768	0.551658
BBOX1	6.03e-11	0.340674	0.246745	0.470359
CYP4A11	0.000596936	0.589076	0.43547	0.796865
OR2I1P	0.52085	0.907419	0.674538	1.2207
SLC22A2	1.53e-08	0.397175	0.288451	0.546877
TINAG	3.41e-06	0.479668	0.351807	0.653999
HAO2	6.47e-08	0.420665	0.307311	0.575829
SLC5A10	0.00206759	0.622311	0.460191	0.841543
PHYHIPL	1.5e-08	0.402336	0.293564	0.551409
GLYATL1	7.81e-08	0.423517	0.309542	0.579459
TMEM174	0.000107586	0.546326	0.402329	0.741862
SLC17A1	0.000644777	0.588112	0.433543	0.797789
SLC27A2	1.34e-08	0.397025	0.288678	0.546037
GLYAT	1.06e-07	0.428486	0.31351	0.585629
VIL1	0.000103492	0.545384	0.401584	0.740677
SLC6A13	2.17e-05	0.511977	0.375896	0.697321
CYP4A22	0.000284945	0.571494	0.422439	0.773143
APOM	0.000406613	0.580188	0.429051	0.784565
SLC39A5	0.000115807	0.549918	0.405746	0.745318
HMGCS2	0.000378679	0.577341	0.426468	0.78159
HHLA2	1.53e-07	0.434293	0.318082	0.592961
AGXT2	3.67e-07	0.444036	0.324734	0.607167
ACSM2A	0.0246651	0.709356	0.525723	0.957132
SLC16A9	1.86e-07	0.433143	0.316231	0.593276
NPR3	5.33e-07	0.451444	0.330822	0.616047
ACSM2B	0.0147518	0.688526	0.510085	0.929389
TMEM82	6.41e-09	0.391504	0.285263	0.537312
SLC23A3	0.000113856	0.549981	0.405949	0.745116
SLC47A1	9.03e-08	0.422843	0.308397	0.57976
SLC17A3	0.000569562	0.586651	0.433143	0.794563
LRP2	2e-07	0.433358	0.316191	0.593942
PKLR	0.000310992	0.572816	0.423144	0.775429
SMIM32	0.0116637	0.679982	0.503885	0.917621
SLC6A19	5.6e-07	0.448798	0.327928	0.614219
DDC	4.42e-06	0.483299	0.354321	0.659229
CYP2J2	0.00044127	0.580139	0.428197	0.785997
TMEM72	0.00418515	0.644476	0.477125	0.870526
GUCA2B	0.00990309	0.673612	0.498903	0.909502
SLC6A18	8.55e-05	0.540467	0.397594	0.73468
SLC22A11	2.14e-07	0.433957	0.316554	0.594903
CXCL14	0.0229671	0.706996	0.524359	0.953248
SLC5A1	0.000102982	0.545467	0.401714	0.740662
CUBN	3.28e-09	0.379077	0.274908	0.52272
FTCD	0.000236618	0.563276	0.414785	0.764927
SLC22A6	6.37e-07	0.455465	0.334214	0.620704
ALDOB	5.86e-06	0.492286	0.362322	0.668869
UGT3A1	0.00119466	0.605666	0.447204	0.820276
AOC1	0.00236277	0.625191	0.461863	0.846276
SMIM24	3.92e-05	0.526299	0.387584	0.71466
SLC16A12	7.15e-10	0.356306	0.256617	0.494722
ALDH8A1	0.00144355	0.61125	0.451541	0.827449
SLC17A4	0.000409193	0.578724	0.427308	0.783794
SLC22A12	4.61e-05	0.527085	0.387351	0.717228
SLC5A8	1.48e-05	0.508675	0.374621	0.6907
SCGN	1.05e-05	0.501144	0.368584	0.681379
PCK1	2.75e-06	0.47841	0.351527	0.651091
SST	0.0101075	0.674047	0.499059	0.910392
CXCL8	0.00477832	1.54382	1.14181	2.08739
OSM	0.00433203	1.55354	1.14784	2.10261
IL6	4.57e-05	1.90626	1.39789	2.5995
CXCL5	0.00555692	1.53203	1.13322	2.07121
SOCS3	0.000884322	1.67539	1.23596	2.27104
PLAUR	0.00018478	1.79615	1.32135	2.44157
CXCL2	0.00333152	1.57205	1.16221	2.12642
LIF	0.000266693	1.75487	1.29699	2.3744
SLC2A3	0.659422	1.06899	0.794545	1.43823
IER3	0.0873516	1.29797	0.962517	1.75032
PODNL1	1.52e-05	1.97268	1.45001	2.68375
SRPX2	0.000650112	1.69132	1.25038	2.28777
ARL4C	0.115752	1.26978	0.94291	1.70998
STEAP3	3.73e-07	2.23855	1.6406	3.05444
MMP19	0.0169398	1.44151	1.06775	1.9461
PTGS2	0.188666	1.2209	0.906653	1.64405
TREM1	0.00606997	1.52266	1.12765	2.05605
IL1R2	0.00310923	1.5742	1.16528	2.1266
PDGFRL	1.3e-06	2.15081	1.57723	2.93296
ADAM12	0.00860362	1.49527	1.1076	2.01862
GPRC5A	0.000183263	1.80006	1.32294	2.44926
FOSL1	0.0015785	1.62909	1.2036	2.20499
GFPT2	1.08e-06	2.16536	1.58741	2.95374
SERPINE1	0.170855	1.23064	0.914401	1.65624
CXCL1	0.000285588	1.75661	1.29567	2.38153
ROR2	0.011874	1.46913	1.08871	1.98248
SCG2	0.00520093	1.54038	1.13769	2.0856
MT2A	0.00444775	1.5443	1.1447	2.08341
CPXM1	0.00297272	1.57574	1.1673	2.12707
IGDCC4	1.8e-07	2.29868	1.68162	3.14216
PLTP	3.08e-06	2.0791	1.52875	2.82758
TGFBI	0.00297604	1.57658	1.16748	2.12905
CLMP	0.00221054	1.59817	1.18363	2.15789
MMP9	0.0195512	1.43046	1.05916	1.93192
APCDD1L	0.000109465	1.82401	1.34519	2.47328
CTHRC1	0.0550798	1.33994	0.993656	1.80689
CFH	0.0105643	1.47765	1.09542	1.99324
COL6A3	0.0765479	1.3088	0.971707	1.76283
GXYLT2	0.0453774	1.3562	1.00629	1.82778
SEMA3C	0.122473	1.26484	0.938751	1.7042
COL1A1	0.0460841	1.35528	1.0053	1.8271
COL11A1	0.00111006	1.65269	1.22195	2.23528
F3	0.0951158	1.28868	0.95675	1.73577
SFRP2	0.133983	1.25636	0.932148	1.69333
COL5A1	0.0147101	1.45153	1.07599	1.95814
RFLNA	0.000265961	1.75484	1.29705	2.37421
AQP9	2.86e-05	1.93374	1.4199	2.63353
EFNA5	0.00103438	1.65856	1.22595	2.24384
IGFBP1	0.0431429	1.36039	1.00954	1.83319
SLC7A5	1.28e-07	2.31674	1.6962	3.16432
NCAM1	0.191108	1.21978	0.905575	1.64302
G0S2	0.0018519	1.61973	1.19557	2.19436
MT1X	0.00558469	1.52691	1.13191	2.05976
CYP1B1	0.0226458	1.41604	1.04995	1.90978
FLNC	0.0091068	1.48945	1.10407	2.00937
CCDC80	0.456116	1.11973	0.83167	1.50756
SLPI	7.67e-06	2.01706	1.48331	2.74288
TFPI2	0.00752411	1.50699	1.11557	2.03574
LOX	0.271306	1.18161	0.877704	1.59074
CXCL6	0.0978501	1.286	0.95477	1.73215
EFEMP1	0.276649	1.1796	0.875983	1.58844
LBP	0.000908436	1.66684	1.23253	2.25419
CHI3L1	0.878506	0.977105	0.726061	1.31495
SPOCK1	0.150984	1.24499	0.923171	1.67899
RARRES1	0.000561455	1.70195	1.25814	2.30231
SLC38A5	5.22e-06	2.0474	1.50426	2.78666
LUM	0.0681395	1.31916	0.979577	1.77647
THBS2	0.679239	1.0646	0.791271	1.43234
PI3	2.51e-07	2.27809	1.666	3.11505
PAEP	5.84e-07	2.23912	1.63213	3.07185
C5orf46	0.0321613	1.38689	1.02824	1.87064
CCL20	0.692466	1.06173	0.789048	1.42864
PPP1R1A	3.22e-06	2.08568	1.5306	2.84205
MMP7	0.0179354	1.43632	1.06424	1.9385
DCN	0.0540928	1.34009	0.994865	1.80512
MFAP4	0.236277	1.19697	0.888924	1.61175
NPTX2	0.192582	1.21903	0.904961	1.6421
PTHLH	0.700067	1.06013	0.787645	1.42689
SAA1	2.58e-08	2.48307	1.80277	3.42011
PPDPFL	0.0369413	1.3759	1.01953	1.85684
KRT19	0.0825702	1.30268	0.966455	1.75589
